# Supplementary material for: Comprehensive Phytohormone Profiling of Kohlrabi during In Vitro Growth and Regeneration: The Interplay with Cytokinin and Sucrose
Source: MDPI journal article supplement (doi:10.3390/life12101585), 2022-10-12
Supplement: s1 [file s1]

# Supplementary Materials for Comprehensive Phytohormone Profiling of Kohlrabi during In Vitro Growth and Regeneration: The Interplay with Cytokinin and Sucrose

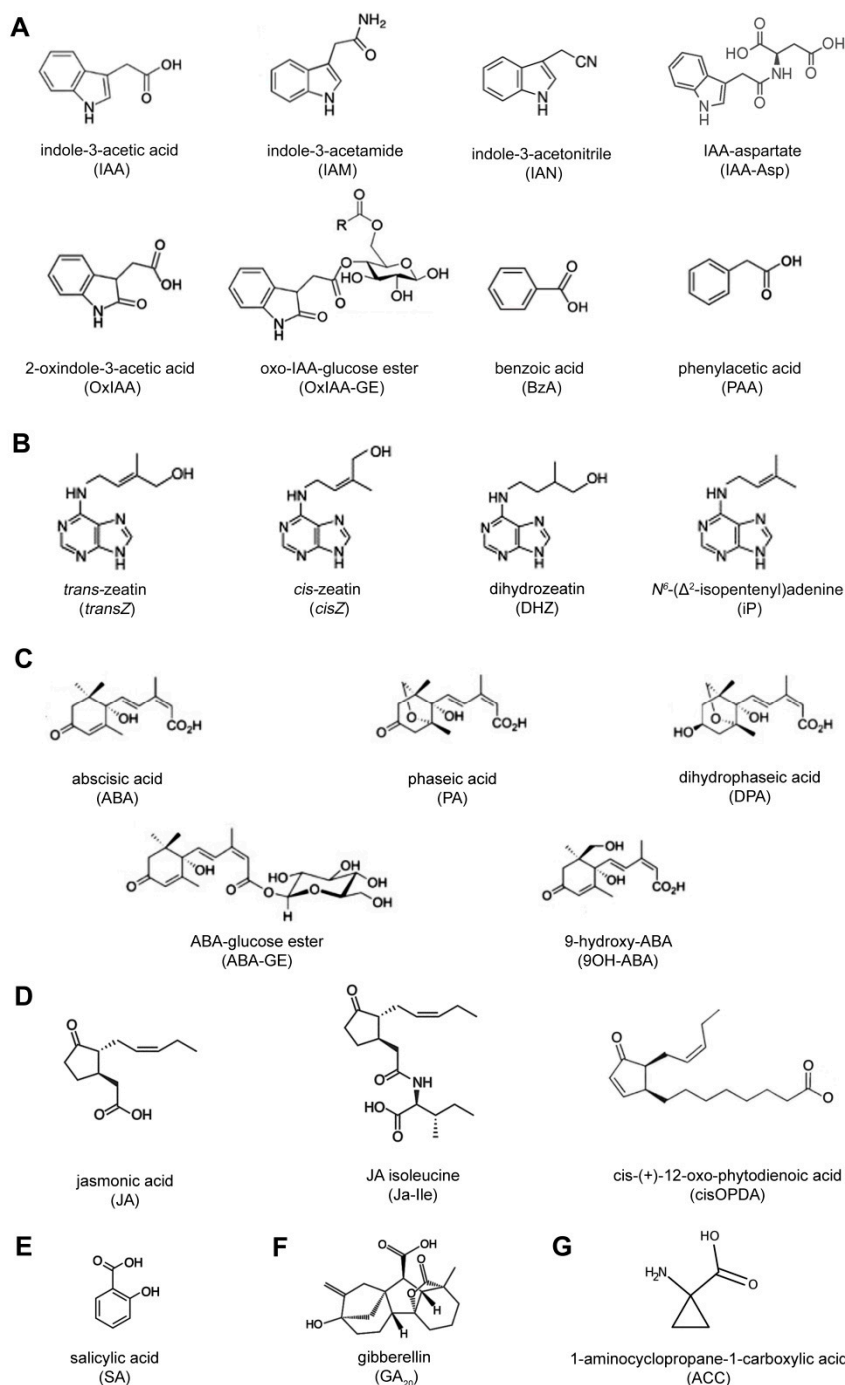

**Figure S1.** Molecular structure of analysed phytohormone groups: (A) auxins; (B) cytokinin nucleobases; (C) abscisic acid; (D) jasmonates; (E) salicylic acid; (F) gibberellin; and (G) ethylene precursor.
